# Supplementary material
Source: publisher site journal article supplement (https://www.spandidos-publications.com/3375/downloadSupplementary)
Supplement: Supplementary file 1 [file downloadSupplementary]

## Sheet: count-miR
Table SII. A total of 39 differentially expressed microRNAs were identified between normal and colon cancer samples (N=4, T=179) in The Cancer Genome Atlas database.
Gene name	logFC	P-value	FDR	meanN	meanT
miR15A	4.34387	7.76×10-35	3.38×10-33	18.521	374.794
miR200B	1.80123	1.61×10-9	1.25×10-8	1830.27	6378.12
miR302B	1.9664	6.74×10-1	1.00×100	1.39×10-17	0.208922
miR200C	-0.816381	8.54×10-4	3.59×10-3	62009.1	35212.2
miR182	5.64019	5.31×10-28	1.46×10-26	973.312	48536.4
miR211	0.781509	1.00×100	1.00×100	1.39×10-17	0.0788939
miR452	5.63424	4.76×10-28	1.36×10-26	7.04614	355.709
miR210	1.64228	4.67×10-3	1.73×10-2	939.937	2934.26
miR21	6.81277	5.70×10-81	1.12×10-78	5385.3	605380
miR301A	5.62762	2.96×10-15	3.60×10-14	0.738496	42.4715
miR34A	2.83831	2.37×10-16	3.02×10-15	46.6138	333.983
miR222	1.17726	2.85×10-5	1.49×10-4	119.261	270.094
miR214	-0.046845	8.17×10-1	1.00×100	68.7525	66.3353
miR130A	2.34348	1.32×10-11	1.26×10-10	21.3341	108.718
miR143	4.01906	1.54×10-10	1.33×10-9	29209	473561
miR155	1.95932	3.92×10-6	2.21×10-5	260.273	1011.83
miR22	2.57556	1.92×10-20	3.17×10-19	22986.2	137020
miR29A	1.72259	1.04×10-9	8.18×10-9	7524.21	24832.3
miR31	3.19489	2.03×10-3	7.98×10-3	6.7322	63.2047
miR26B	3.04969	1.82×10-24	4.07×10-23	224.837	1862.36
miR7-3HG	4.87205	2.35×10-9	1.80×10-8	0.393392	14.0036
miR148A	4.48449	2.44×10-27	6.59×10-26	8864.71	198438
miR19A	10.8631	8.92×10-27	2.26×10-25	1.39×10-17	193.158
miR10A	3.97768	5.53×10-15	6.53×10-14	14263.5	224714
miR203A	5.31637	8.29×10-21	1.48×10-19	1613.02	64271.2
miR106B	0.419519	1.85×10-2	5.99×10-2	1284.8	1716.96
miR15B	-1.36656	3.97×10-14	4.51×10-13	1578.48	611.676
miR126	4.73696	7.11×10-39	3.99×10-37	241.354	6438.94
miR205	2.3078	3.39×10-1	6.92×10-1	19.5463	97.5038
miR145	-2.81505	2.79×10-27	7.43×10-26	54983.5	7812.76
miR200A	1.89823	6.22×10-11	5.61×10-10	1939.48	7228.72
miR135B	10.092	3.47×10-23	7.26×10-22	0.139152	303.918
miR429	4.54574	7.16×10-27	1.87×10-25	51.798	1209.51
miR133B	-1.16385	3.54×10-2	1.04×10-1	34.2694	15.2468
miR10B	2.93595	1.82×10-12	1.82×10-11	13973.5	106934
miR17	3.96083	2.80×10-26	6.88×10-25	276.174	4299.22
miR146B	0.552702	7.03×10-2	1.82×10-1	1080.5	1584.72
miR202	2.93464	8.47×10-2	2.15×10-1	0.151948	2.05917
miR375	-2.06007	8.72×10-11	7.78×10-10	332617	79762.7
FDR, false discovery rate; miR, microRNA; T, tumor; N, normal.
